# Supplementary material
Source: PubMed Central journal article supplement (PMC4559600)
Supplement: NIHMS693813-supplement-1.pdf [file NIHMS693813-supplement-1.pdf]

## **Inventory of Supplemental Information**

Supplemental Information contains 6 Figures, Experimental Procedures, and References.
